# Supplementary material for: The Impact of COVID-19 in Total Hip Arthroplasty: A Comparison Study in a Center without Elective Surgery Protocols
Source: Research Square preprint supplement (doi:10.21203/rs.3.rs-4978724/v1), 2025-08-27
Supplement: Supplementary file 1 [file 32ef4ee31c847f43e89a86f3.docx]

| Table 1. Surgical indications in total hip arthroplasty during and before COVID-19 pandemic | | | |  |
| --- | --- | --- | --- | --- |
|  | **Total % (n*)** | **Pre-COVID-19 % (n)** | **COVID-19 % (n)** | **P-valueϕ** |
| Osteoarthritis | 10.5 (32) | 15 (18) | 7.6 (14) | 0.040 |
| Rheumatoid and other inflammatory arthritis | 3.3 (10) | 6.7 (8) | 1.1 (2) | 0.007 |
| Avascular necrosis | 19.7 (60) | 15 (18) | 22.8 (42) | 0.093 |
| Post-traumatic arthritis | 22 (67) | 19.2 (23) | 23.9 (44) | 0.329 |
| Developmental dysplasia of the hip and other congenital disorders | 9.9 (30) | 7.5 (9) | 11.4 (21) | 0.263 |
| Trauma | 34.5 (105) | 36.7 (44) | 33.2 (61) | 0.528 |
| *n= number, ϕP-value<0.05 is considered significant | | | |  |

| Table 2. Past medical history in total hip arthroplasty during and before COVID-19 pandemic | | | | | |
| --- | --- | --- | --- | --- | --- |
|  | **Total % (n*)** | **Pre-COVID-19 % (n)** | | **COVID-19 % (n)** | **P-valueϕ** |
| DMα | 9.5 (29) | | 10.8 (13) | 8.7 (16) | 0.554 |
| HTNβ | 18.8 (57) | | 21.7 (26) | 16.8 (31) | 0.297 |
| CADδ | 7.6 (23) | | 9.2 (11) | 6.5 (12) | 0.506 |
| *n= number, ϕP-value<0.05 is considered significant, αDM= diabetes mellitus, β HTN= hypertension, δCAD= coronary artery disease | | | | | |

| Table 3. In-hospital surgical and medical complications in total hip arthroplasty during and before COVID-19 pandemic | | | | |
| --- | --- | --- | --- | --- |
|  | **Total % (n*)** | **Pre-COVID-19 % (n)** | **COVID-19 % (n)** | **P-valueϕ** |
| SSIθ | 1.9 (6) | 2.5 (3) | 1.6 (3) | 0.684 |
| Prosthesis dislocation | 0.3 (1) | 0 (0) | 0.5 (1) | 1.000 |
| Periprosthetic infection | 1.3 (4) | 0.8 (1) | 1.6 (3) | 1.000 |
| Implant loosening | 0.7 (2) | 1.7 (2) | 0 (0) | 0.155 |
| Extended wound drainage | 1.3 (4) | 0.8 (1) | 1.6 (3) | 1.000 |
| Nerve injury | 0.7 (2) | 0.8 (1) | 0.5 (1) | 1.000 |
| DVTσ | 1.6 (5) | 2.5 (3) | 1.1 (2) | 0.387 |
| Arrhythmia | 1.3 (4) | 0 (0) | 2.2 (4) | 0.156 |
| AKIλ | 0.7 (2) | 0.8 (1) | 0.5 (1) | 1.000 |
| Gastrointestinal | 0.7 (2) | 0.8 (1) | 0.5 (1) | 1.000 |
| MIμ | 1.3 (4) | 0.8 (1) | 1.6 (3) | 0.551 |
| LOCν | 0.3 (1) | 0.8 (1) | 0 (0) | 0.395 |
| Sepsis | 2 (6) | 0.8 (1) | 2.7 (5) | 0.409 |
| Genitourinary | 0.7 (2) | 0.8 (1) | 0.5 (1) | 1.000 |
| Mortality | 0.9 (3) | 1.6 (2) | 0.5 (1) | 0.564 |
| *n= number, ϕP-value<0.05 is considered significant, θSSI= superficial surgical site infections,σDVT= Deep Vein Thrombosis,λAKI= Acute Kidney Injury,μMI= Myocardial Infarction,νLOC= Loss of Consciousness | | | | |

| Table 4. The number of packed cell transfusions between pre-COVID-19 and COVID-19 period | | | |
| --- | --- | --- | --- |
|  | **Pre-COVID-19**  **mean±SD*** | **COVID-19**  **mean±SD** | **P-valueϕ** |
| Pre-operation | 0.00±0.09 | 0.02±0.17 | 0.450 |
| Operation | 0.37±0.68 | 0.30±0.61 | 0.350 |
| Post-operation | 0.33±0.91 | 0.32±0.92 | 0.947 |
| ϕP-value<0.05 is considered significant, *SD= standard deviation | | | |
